# Supplementary material
Source: PubMed Central journal article supplement (PMC3558616)

## Supplemental Information

**Table S1.** List of strains and plasmids used in this study.

| Strain, plasmid             | Description <sup>a</sup>                                                                                                                                                                             | Ref./source                       |
|-----------------------------|------------------------------------------------------------------------------------------------------------------------------------------------------------------------------------------------------|-----------------------------------|
| <b><i>E. coli</i></b>       |                                                                                                                                                                                                      |                                   |
| TOP10                       | F <sup>-</sup> <i>mcrA</i> Δ( <i>mrr-hsdRMS-mcrBC</i> ) Φ80 <i>lacZ</i> ΔM15 Δ <i>lacX74 recA1 araD139</i> Δ( <i>ara leu</i> )7697 <i>galU galK rpsL</i> (Str <sup>r</sup> ) <i>endA1 nupG</i>       | Invitrogen                        |
| XL-1 Blue                   | <i>recA1 endA1 gyrA96 thi-1 hsdR17 supE44 relA1 lac</i> , F' <i>proAB lacIq</i> ΔM15 Tn10 Tet <sup>r</sup>                                                                                           | Stratagene                        |
| XL10-Gold                   | Tet <sup>r</sup> Δ( <i>mcrA</i> )183 Δ( <i>mcrCB-hsdSMR-mrr</i> )173 <i>endA1 supE44 thi-1 recA1 gyrA96 relA1 lac</i> Hte [F' <i>proAB lacIq</i> ΔM15 Tn10 (Tet <sup>r</sup> ) Amy Cm <sup>r</sup> ] | Stratagene                        |
| Rosetta (DE3)               | F <sup>-</sup> <i>ompT hsdS<sub>B</sub></i> (r <sub>B</sub> <sup>-</sup> m <sub>B</sub> <sup>-</sup> ) <i>gal dcm</i> (DE3) pRARE (Cm <sup>r</sup> )                                                 | Novagen                           |
| GM2163                      | <i>dam-13::Tn 9 dcm-6 hsdR2 leuB6 his-4 thi-1 ara-14 lacY1 galK2 galT22 xyl-5 mtl-1 rpsL136 tonA31 tsx-78 supE44 McrA- McrB</i>                                                                      | New England Biolabs               |
| <b><i>H. volcanii</i></b>   |                                                                                                                                                                                                      |                                   |
| DS70                        | Wild-type isolate DS2 cured of plasmid pHV2                                                                                                                                                          | (Wendoloski <i>et al.</i> , 2001) |
| H26                         | DS70 <i>pyrE2</i>                                                                                                                                                                                    | (Allers <i>et al.</i> , 2004)     |
| HM1041                      | H26 <i>samp1</i>                                                                                                                                                                                     | (Miranda <i>et al.</i> , 2011)    |
| HM1052                      | H26 <i>ubaA</i>                                                                                                                                                                                      | (Miranda <i>et al.</i> , 2011)    |
| HM1096                      | H26 <i>samp1 samp2 hvo_2177*</i>                                                                                                                                                                     | (Miranda <i>et al.</i> , 2011)    |
| HM1109 <sup>b</sup>         | HM1041 <i>moaE</i>                                                                                                                                                                                   | This study                        |
| <b>Plasmids<sup>c</sup></b> |                                                                                                                                                                                                      |                                   |
| pET15b                      | Amp <sup>r</sup> ; expression vector                                                                                                                                                                 | Novagen                           |
| pTA131                      | Amp <sup>r</sup> ; devoid of <i>H. volcanii</i> origin of replication, carries <i>pyrE2</i> marker used for homologous recombination                                                                 | (Allers <i>et al.</i> , 2004)     |
| pJAM809                     | Amp <sup>r</sup> Nv <sup>r</sup> ; StrepII cloning vector for <i>H. volcanii</i>                                                                                                                     |                                   |
| pJAM939                     | Amp <sup>r</sup> Nv <sup>r</sup> ; Flag-HVO_0383 in <i>H. volcanii</i>                                                                                                                               | (Humbard <i>et al.</i> , 2010)    |
| pJAM947                     | Amp <sup>r</sup> Nv <sup>r</sup> ; Flag-SAMP1 in <i>H. volcanii</i>                                                                                                                                  | (Humbard <i>et al.</i> , 2010)    |
| pJAM949                     | Amp <sup>r</sup> Nv <sup>r</sup> ; Flag-SAMP2 in <i>H. volcanii</i>                                                                                                                                  | (Humbard <i>et al.</i> , 2010)    |
| pJAM979-1c                  | Amp <sup>r</sup> Nv <sup>r</sup> ; pJAM809-derived, HvJAMM1-StrepII in <i>H. volcanii</i>                                                                                                            | This study                        |
| pJAM991                     | Amp <sup>r</sup> ; pET15b-derived, His <sub>6</sub> -HvJAMM1 in <i>E. coli</i>                                                                                                                       | This study                        |
| pJAM1114                    | Amp <sup>r</sup> ; 'knockout' plasmid for <i>moaE</i>                                                                                                                                                | (Miranda <i>et al.</i> , 2011)    |
| pJAM1119                    | Amp <sup>r</sup> Nv <sup>r</sup> ; MoaE-StrepII in <i>H. volcanii</i>                                                                                                                                | (Miranda <i>et al.</i> , 2011)    |
| pJAM1191                    | Amp <sup>r</sup> ; 'pre-knockout' plasmid, carries HvJAMM1 gene and 500 bp DNA flanking gene in pTA131                                                                                               | This study                        |
| pJAM1197                    | Amp <sup>r</sup> Nv <sup>r</sup> ; Flag-SAMP1 S85K in <i>H. volcanii</i>                                                                                                                             | This study                        |
| pJAM1213                    | Amp <sup>r</sup> ; pET15b-derived, His <sub>6</sub> -HvJAMM2 in <i>E. coli</i>                                                                                                                       | This study                        |
| pJAM1214                    | Amp <sup>r</sup> ; pJAM991-derived, His <sub>6</sub> -HvJAMM1 H90Q in <i>E. coli</i>                                                                                                                 | This study                        |
| pJAM1215                    | Amp <sup>r</sup> ; pJAM991-derived, His <sub>6</sub> -HvJAMM1 D101E in <i>E. coli</i>                                                                                                                | This study                        |
| pJAM1314                    | Amp <sup>r</sup> Nv <sup>r</sup> ; pJAM947- and pJAM1119-derived, Flag-SAMP1 and MoaE-StrepII in <i>H. volcanii</i>                                                                                  | This study                        |

|          |                                                                                                                                 |            |
|----------|---------------------------------------------------------------------------------------------------------------------------------|------------|
| pJAM1769 | Amp <sup>r</sup> ; 'knockout' plasmid for HvJAMM1; carries in-frame deletion of HvJAMM1 gene with 500 bp flanking DNA in pTA131 | This study |
| pJAM1770 | Amp <sup>r</sup> ; pJAM991-derived, His <sub>6</sub> -HvJAMM1 H88N in <i>E. coli</i>                                            | This study |
| pJAM1771 | Amp <sup>r</sup> ; pJAM991-derived, His <sub>6</sub> -HvJAMM1 D94N in <i>E. coli</i>                                            | This study |
| pJAM1772 | Amp <sup>r</sup> ; pJAM991-derived, His <sub>6</sub> -HvJAMM1 S98A in <i>E. coli</i>                                            | This study |
| pJAM1778 | Amp <sup>r</sup> Nv <sup>r</sup> ; pJAM991-derived, His <sub>6</sub> -HvJAMM1 E31D in <i>E. coli</i>                            | This study |
| pJAM1777 | Amp <sup>r</sup> Nv <sup>r</sup> ; pJAM1197- and pJAM1119-derived, Flag-SAMP1 S85K and MoaE-StrepII in <i>H. volcanii</i>       | This study |
| pJAM1786 | Amp <sup>r</sup> Nv <sup>r</sup> ; HvJAMM1-StrepII E31D in <i>E. coli</i>                                                       | This study |
| pJAM1791 | Amp <sup>r</sup> ; pJAM991-derived, His <sub>6</sub> -HvJAMM1 C115S in <i>E. coli</i>                                           | This study |
| pJAM1796 | Amp <sup>r</sup> Nv <sup>r</sup> ; pJAM1314-derived, Linear Flag-SAMP1-MoaE M1A-StrepII in <i>H. volcanii</i>                   | This study |
| pJAM1804 | Amp <sup>r</sup> Nv <sup>r</sup> ; pJAM1314-derived, Linear Flag-SAMP1ΔGG-MoaE M1A-StrepII in <i>H. volcanii</i>                | This study |
| pJAM1806 | Amp <sup>r</sup> Nv <sup>r</sup> ; pJAM1314-derived, Linear Flag-SAMP1ΔGG-MoaE-StrepII in <i>H. volcanii</i>                    | This study |
| pJAM1807 | Amp <sup>r</sup> Nv <sup>r</sup> ; pJAM1314-derived, Linear Flag-SAMP1ΔVSGG-MoaE-StrepII in <i>H. volcanii</i>                  | This study |
| pJAM1810 | Amp <sup>r</sup> Nv <sup>r</sup> ; pJAM947- and pJAM979-1c-derived, Flag-SAMP1 and HvJAMM1 genes in tandem                      | This study |
| pJAM1811 | Amp <sup>r</sup> Nv <sup>r</sup> ; pJAM947 and pJAM1786-derived, Flag-SAMP1 and HvJAMM1 E31D genes in tandem                    | This study |
| pJAM1812 | Amp <sup>r</sup> Nv <sup>r</sup> ; pJAM949-and pJAM979-1c derived, Flag-SAMP2 and HvJAMM1 genes in tandem                       | This study |
| pJAM1814 | Amp <sup>r</sup> Nv <sup>r</sup> ; pJAM949 and pJAM1786-derived, Flag-SAMP2 and HvJAMM1 E31D genes in tandem                    | This study |

<sup>a</sup>Str<sup>r</sup>, Tet<sup>r</sup>, Cm<sup>r</sup>, Amp<sup>r</sup> and Nv<sup>r</sup> denote streptomycin, tetracycline, chloramphenicol, ampicillin and novobiocin resistance.

<sup>b</sup> HM1109 was constructed using the pop-in/pop-out method (Allers et al., 2004) with plasmid pJAM1114 and parent strain HM1041. PCR primers used to confirm integration of the plasmid on the genome and to identify strains in which resolution of this integrant generated a deletion of *moaE* on the genome were as previously described (Miranda et al., 2011).

<sup>c</sup>Primer pairs used for generation of the plasmids in this study are numbered and listed in Table S2. Plasmids pJAM991 and pJAM1213 used for synthesis of N-terminal His<sub>6</sub>-tagged HvJAMM1 (HVO\_2505) and HvJAMM2 in recombinant *E. coli* were generated as follows. The HvJAMM1/2 genes were amplified by PCR from *H. volcanii* DS70 genomic DNA using primer pairs 1/2 and ligated into the NdeI to BlnI sites of plasmid vector pET15b. For co-expression of Flag-SAMP1 and MoaE-StrepII genes, the NotI to BamHI fragment of pJAM1119 (encoding MoaE-StrepII) was blunt-end ligated into the BlnI site of pJAM947 (encoding Flag-SAMP1) to generate plasmid pJAM1314. The plasmid with the *pyrE2* marker of pTA131 that was constructed for targeted in-frame deletion of the HvJAMM1 gene from the *H. volcanii* chromosome by the pop-in/pop-out method (Allers et al., 2004) was constructed as follows. First, a pre-knockout plasmid (pJAM1191) was generated by ligation of a PCR-derived BamHI-to-HindIII fragment of DNA from *H. volcanii* DS70 (that carries the HvJAMM1 gene and ~500 bp of flanking DNA) with primer pair 12 into plasmid pTA131. Plasmid pJAM1191 was used as a template for inverse PCR with primer pair 13 to generate knockout plasmid pJAM1769, which had an in-frame deletion of the HvJAMM1 gene and was used to transform the Δ*pyrE2* *H. volcanii* strain H26 to uracil prototrophy. For site-directed mutagenesis of the HvJAMM1 encoding gene, the QuikChange site-directed mutagenesis kit (Stratagene) was used with plasmid pJAM991 as the template and primer pairs 3-9, which resulted in the generation of plasmids pJAM1214, pJAM1215, pJAM1770, pJAM1771,

pJAM1772, pJAM1778, and pJAM1791. For site-directed mutagenesis of the SAMP1 encoding gene, primer pair 10 and template pJAM947 were used for PCR. The resulting “SAMP1 S85K” PCR product was ligated into the KpnI to BlnI sites of plasmid pJAM939 to generate plasmid pJAM1197. For co-expression of genes encoding Flag-SAMP1 S85K and MoaE-StrepII, the NotI to BamHI fragment of pJAM1119 (encoding MoaE-StrepII) was ligated into the BlnI site of pJAM1197 (encoding Flag-SAMP1 S85K) to generate plasmid pJAM1777. To generate a Flag-SAMP-MoaE-StrepII linear fusion and variants, inverse PCR was used with primer pairs 11-14 and plasmid pJAM1314 as a template. The resulting linear PCR products were treated with T4 polynucleotide kinase prior to generating plasmids pJAM1796, pJAM1806, pJAM1804 and pJAM1807 by ligation. To generate plasmids for expression of HvJAMM1-StrepII in *H. volcanii*, PCR was performed using primer pair 18 and *H. volcanii* DS70 genomic DNA as template. The PCR product was ligated into the NdeI and KpnI sites of pJAM809 to generate plasmid pJAM979-1c. Plasmid pJAM979-1c served as a template for QuikChange (Stratagene) site-directed mutagenesis with primer pair 3 to generate plasmid pJAM1786. For *in trans* expression of the Flag-SAMP genes with either the HvJAMM1-StrepII wild-type or E31D gene, the NdeI to BlnI fragments of plasmids pJAM979-1c and pJAM1786 were ligated into the blunt-ended BlnI site of plasmids pJAM947 and pJAM949 to generate plasmids pJAM1810, pJAM1811, pJAM1812 and pJAM1814 (with gene orientation confirmed by restriction mapping and DNA sequencing).

**Table S2.** List of primers used in this study.

| Primer pair no. | Primer Name               | Oligonucleotide Sequence <sup>a</sup>               |
|-----------------|---------------------------|-----------------------------------------------------|
| 1               | HvJAMM1 NdeI up           | 5'- <i>TTCCGGG</i> catatgACTTCGAGTAGGCTCTCTCTC-3'   |
|                 | HvJAMM1 BlnI stop         | 5'-AATgctcagcTCACTCGACGGCGACGGAGAG-3'               |
| 2               | HvJAMM2 NdeI up           | 5'- <i>CCCACCTT</i> catatgCGACTCTTCCGGTCG-3'        |
|                 | HvJAMM2 BlnI stop         | 5'-AATgctcagcTCATCGGTCCAACCTCCGC-3'                 |
| 3               | HvJAMM1 E31D fwd          | 5'-GGCGACCCGCCCGcT <u>GAc</u> GTCTGtGGaGTCCTCGC-3'  |
|                 | HvJAMM1 E31D rev          | 5'-GCGAGGACTCCaCAGACg <u>TCa</u> GCGGGCGGGTCGCC -3' |
| 4               | HvJAMM1 H88N fwd          | 5'-GTCGGCTTCTACa <u>ACT</u> CGCACCCCGA-3'           |
|                 | HvJAMM1 H88N rev          | 5'-GACTCGGGGTGCGAGTtGTAGAAGC-3'                     |
| 5               | HvJAMM1 H90Q fwd          | 5'-TACCACTCGC <u>Ag</u> CCCGA-3'                    |
|                 | HvJAMM1 H90Q rev          | 5'-TCGGGcT <u>G</u> CGAGTGGTA-3'                    |
| 6               | HvJAMM1 D94N fwd          | 5'-CCCCGAGTCCa <u>AC</u> CCGGTCCCGAG-3'             |
|                 | HvJAMM1 D94N rev          | 5'-CTCGGGACCGGGTtGGACTCGGG-3'                       |
| 7               | HvJAMM1 S98A fwd          | 5'-CCCGGTCCCg <u>gc</u> CGCGACGGACC-3'              |
|                 | HvJAMM1 S98A rev          | 5'-GGTCCGTCCG <u>Ggc</u> CGGGACCGGG-3'              |
| 8               | HvJAMM1 D101E fwd         | 5'-GCGACGGa <u>Aa</u> CGGGAACGGGC-3'                |
|                 | HvJAMM1 D101E rev         | 5'-GCCCGTCCCGt <u>TCC</u> GTCTGC-3'                 |
| 9               | HvJAMM1 C115S fwd         | 5'-CGTCTATCTCATCTc <u>CT</u> CGCCCCACGGCC -3'       |
|                 | HvJAMM1 C115S rev         | 5'-GGCCGTGGGGCGAGg <u>AG</u> ATGAGATAGACG -3'       |
| 10              | SAMP1 S85K KpnI up        | 5'-AAggtaccGAGTGGAAGCTGTTCCGGACCTCG-3'              |
|                 | SAMP1 S85K BlnI down      | 5'-TAATgctcagcCTAGCCGCCctTGACCGG -3'                |
| 11              | SAMP1 dwn inv             | 5'-GCCACCACTGACCGGCGGGAACAG -3'                     |
|                 | MoaE fwd up M1A           | 5'-gctCACGTCCTCGGAATCGTCGGCG -3'                    |
| 12              | SAMP1 dw inv ΔGG          | 5'-ACTGACCGGCGGGAACAGCGCGAG -3'                     |
|                 | MoaE FW up                | 5'-ATGCACGTCCTCGGAATCGTCGGCG -3'                    |
| 13              | SAMP1 dw inv ΔGG          | 5'-ACTGACCGGCGGGAACAGCGCGAG -3'                     |
|                 | MoaE fwd up M1A           | 5'-gctCACGTCCTCGGAATCGTCGGCG -3'                    |
| 14              | SAMP1 dw inv ΔVSGG        | 5'-CGGCGGGAACAGCGCGAGTTCG -3'                       |
|                 | MoaE FW up                | 5'-ATGCACGTCCTCGGAATCGTCGGCG -3'                    |
| 15              | Hvo_2505 511 BamHI FWD    | 5'-ATggatccGCAGCGCAGGACGTCAT-3'                     |
|                 | Hvo_2505 521 HindIII REV  | 5'-GCGaagcttGAGACGTTGACGACGC-3'                     |
| 16              | Hvo_2505 inv up REV       | 5'-GGCGCATGGCGATTCGAACCACGGA-3'                     |
|                 | Hvo_2505 inv down FWD     | 5'-TCGGCTCTCGGCCAGTCGCC-3'                          |
| 17              | Hvo_2505 720 up FWD       | 5'-GCGCCGTAAACGACCTCATCACCC-3'                      |
|                 | Hvo_2505 687 dwn REV      | 5'-GGTCGGTTCGCCTCCTCGCC-3'                          |
| 18              | HVO2505 NdeI up           | 5'- <i>TTCCGGG</i> catATGACTTCGAGTAGGCTCTCTCTC-3'   |
|                 | Hvo2505 KpnI StrepII down | 5'-AAggtaccCTCGACGGCGACGGAGAGTTCG-3'                |

<sup>a</sup>Lowercase letters indicate restriction enzyme site or site directed mutation that was introduced into the primer sequence. Underlined letters indicate modified codon. Italicized uppercase letters indicate random bases introduced into primer to enhance cleavage of PCR product by restriction enzyme.

**Table S3.** Mov34-MPN-PAD-1 superfamily (cl13996) protein sequences included in the dendrogram (Fig. 1).

| <b>Protein family</b>                     | <b>Protein</b>                | <b>Species</b>                                | <b>GI number</b> |
|-------------------------------------------|-------------------------------|-----------------------------------------------|------------------|
| <b>cd08072<br/>MPN<br/>archaeal</b>       | Hmuk_1908                     | <i>Halomicrobium mukohataei</i>               | GI:257387955     |
|                                           | rrnAC1439                     | <i>Haloarcula marismortui</i>                 | GI:55378222      |
|                                           | HacjB3_10795                  | <i>Halalkalicoccus jeotgali</i>               | GI:299125203     |
|                                           | Huta_0716                     | <i>Halorhabdus utahensis</i>                  | GI: 257051801    |
|                                           | Nmag_0620                     | <i>Natrialba magadii</i>                      | GI:289580302     |
|                                           | Htur_2117                     | <i>Haloterrigena turkmenica</i>               | GI:284165394     |
|                                           | Hlac_2405                     | <i>Halorubrum lacusprofundi</i>               | GI:222480813     |
|                                           | NP3222A                       | <i>Natronomonas pharaonis</i>                 | GI:76802251      |
|                                           | OE2140R                       | <i>Halobacterium salinarum</i>                | GI:169235664     |
|                                           | HQ1580A                       | <i>Haloquadratum walsbyi</i>                  | GI:110667539     |
|                                           | HVO_1016<br>(HvJAMM2)         | <i>Haloferax volcanii</i>                     | GI:292655176     |
|                                           | Hbor_21950                    | <i>Halogeometricum borinquense</i>            | GI:313126933     |
|                                           | Mpal_0311                     | <i>Methanosphaerula palustris</i>             | GI:219850984     |
|                                           | MCP_1751                      | <i>Methanocella paludicola SANA E</i>         | GI:282164421     |
|                                           | AfJAMM                        | <i>Archaeoglobus fulgidus</i>                 | GI:11499780      |
|                                           | MTBMA_c13570                  | <i>Methanothermobacter marburgensis</i>       | GI:304315110     |
|                                           | MTH_971                       | <i>Methanothermobacter thermautotrophicus</i> | GI:74548643      |
|                                           | Msp_1146                      | <i>Methanosphaera stadtmanae</i>              | GI:84489938      |
|                                           | Mfer_0041                     | <i>Methanothermus fervidus</i>                | GI:312136270     |
|                                           | MCON_1492                     | <i>Methanosaeta concilii</i>                  | GI:330507535     |
|                                           | Mbur_0623                     | <i>Methanococcoides burtonii</i>              | GI:91772652      |
|                                           | Mmah_0889                     | <i>Methanohalophilus mahii</i>                | GI:292666563     |
|                                           | MA1736                        | <i>Methanosarcina acetivorans</i>             | GI:20090588      |
| MM_2631                                   | <i>Methanosarcina mazei</i>   | GI:21228733                                   |                  |
| Mbar_A3046                                | <i>Methanosarcina barkeri</i> | GI:73670502                                   |                  |
| <b>cd08070,<br/>MPN-like<br/>archaeal</b> | Hlac_1268                     | <i>Halorubrum lacusprofundi</i>               | GI:222479693     |
|                                           | HacjB3_14840                  | <i>Halalkalicoccus jeotgali</i>               | GI:299126008     |
|                                           | NP0062A                       | <i>Natronomonas pharaonis</i>                 | GI:76800686      |
|                                           | HQ3151A                       | <i>Haloquadratum walsbyi</i>                  | GI:110669036     |
|                                           | Htur_3493                     | <i>Haloterrigena turkmenica</i>               | GI:284166749     |
|                                           | Nmag_1532                     | <i>Natrialba magadii</i>                      | GI:289530757     |
|                                           | OE3561F                       | <i>Halobacterium salinarum</i>                | GI:169236469     |
|                                           | HVO_2505<br>(HvJAMM1)         | <i>Haloferax volcanii</i>                     | GI:292656626     |
|                                           | Hbor_09090                    | <i>Halogeometricum borinquense</i>            | GI:313125679     |
|                                           | Mpal_1140                     | <i>Methanosphaerula palustris</i>             | GI:219851774     |

|                                              |                                |                                              |              |
|----------------------------------------------|--------------------------------|----------------------------------------------|--------------|
|                                              | Mmah_0694                      | <i>Methanohalophilus mahii</i>               | GI:292666370 |
|                                              | Ferp_0703                      | <i>Ferroglobus placidus</i>                  | GI:288893336 |
|                                              | TERMP_1706<br>(TERMP_01270)    | <i>Thermococcus barophilus</i>               | GI:315231033 |
|                                              | TK1033                         | <i>Thermococcus kodakarensis</i>             | GI:57640968  |
|                                              | TSIB_0762                      | <i>Thermococcus sibiricus</i>                | GI:242398748 |
|                                              | TON_1119                       | <i>Thermococcus onnurineus</i>               | GI:212224268 |
|                                              | TAM4_1711                      | <i>Thermococcus</i> sp. AM4                  | GI:223478291 |
|                                              | PAB1919                        | <i>Pyrococcus abyssi</i>                     | GI:14520886  |
|                                              | PH1488                         | <i>Pyrococcus horikoshii</i>                 | GI:14591273  |
|                                              | PF1070                         | <i>Pyrococcus furiosus</i>                   | GI:18893137  |
|                                              | CSUB_C0703                     | Candidatus <i>Caldiarchaeum subterraneum</i> | GI:343484908 |
|                                              | CENSYa_0531                    | <i>Cenarchaeum symbiosum</i> A               | GI:118194246 |
|                                              | Nmar_1227                      | <i>Nitrosopumilus maritimus</i>              | GI:161528735 |
|                                              | APE0681<br>( APE0681.1)        | <i>Aeropyrum pernix</i>                      | GI:116062476 |
|                                              | Igag_1456                      | <i>Ignisphaera aggregans</i>                 | GI:305663850 |
|                                              | Pcal_1011                      | <i>Pyrobaculum calidifontis</i>              | GI:126459624 |
|                                              | Tneu_1283                      | <i>Thermoproteus neutrophilus</i>            | GI:171185737 |
|                                              | Pars_2085                      | <i>Pyrobaculum arsenaticum</i>               | GI:145592281 |
|                                              | Kcr_0989                       | Candidatus <i>Korarchaeum cryptofilum</i>    | GI:170290602 |
| <b>cd08070,<br/>MPN-like<br/>bacterial</b>   | Mec+ (Rv1334)                  | <i>Mycobacterium tuberculosis</i>            | GI:54042514  |
|                                              | TTC1133                        | <i>Thermus thermophilus</i>                  | GI:46199435  |
|                                              | QbsD                           | <i>Pseudomonas fluorescens</i>               | GI:28192389  |
| <sup>1</sup> un-classified                   | CSUB_C1473<br>( <i>rpn11</i> ) | Candidatus <i>Caldiarchaeum subterraneum</i> | GI:315426919 |
| <b>cd08066,<br/>AMSH-like</b>                | AMSH-LP <sup>2</sup>           | Human ( <i>Homo sapiens</i> )                | GI:71153542  |
|                                              | AMSH                           | Human ( <i>Homo sapiens</i> )                | GI:71153538  |
| <b>cd08067,<br/>histone H2A<br/>DUB-type</b> | 2A-DUB                         | Human ( <i>Homo sapiens</i> )                | GI:74756898  |
| <b>cd08068,<br/>BRCC36-type</b>              | BRCC36                         | Human ( <i>Homo sapiens</i> )                | GI:20532383  |
| <b>cd08069,<br/>Rpn11 and<br/>CSN5-type</b>  | Rpn11                          | Yeast ( <i>Saccharomyces cerevisiae</i> )    | GI:1171012   |
|                                              | Poh1                           | Human ( <i>Homo sapiens</i> )                | GI:51701716  |
|                                              | CSN5                           | Yeast ( <i>Saccharomyces cerevisiae</i> )    | GI:239938615 |
|                                              | CSN5                           | Human ( <i>Homo sapiens</i> )                | GI:55976562  |

<sup>1</sup>GenBank GI:315426919 annotation only classified CSUB\_C1473 to level of MPN superfamily (cl13996).

<sup>2</sup>Abbreviations: AMSH, associated molecule with the SH3 domain of STAM or endosome-associated ubiquitin isopeptidase; AMSH-LP, AMSH-like protein; 2A-DUB, histone H2A deubiquitinase MYSM1  
2A-DUB, BRCC36, a Lys-63-specific deubiquitinase subunit of two different complexes through interactions with two different adaptor proteins Abraxas and ABRO1; Rpn11, 26S proteasome regulatory particle subunit 11; Poh1, 26S proteasome-associated PAD1 homolog 1; CSN5, COP9 signalosome complex subunit 5.

## Suppl. Figure Legends

**Figure S1.** Gene neighborhood and co-occurrence patterns of representative archaeal JAMM domain proteins from group I (cd08070 family) and group II (cd08072 family), as determined using STRING 9.0 (Szklarczyk et al., 2011).

**Figure S2.** Multiple amino acid sequence alignment of JAMM/MPN+ domain proteins. Proteins for alignment included HvJAMM1 (HVO\_2505), HvJAMM2 (HVO\_1016), AfJAMM (AF2198) and the central domain of human AMSH (GI: 4098124) (where gene locus tag and GI numbers are indicated in parenthesis). Identical and conserved amino acid residues are highlighted in black/red and grey, respectively. Conserved residues of the JAMM/MPN+ motif ( $EX_nH[S/T]HX_7SX_2D$ , where X represents any residue) including residues likely to coordinate the catalytic  $Zn^{2+}$  and water molecule are highlighted in red. A conserved cysteine residue predicted to reside near the active site of HvJAMM1 is highlighted in pink. Amino acid position number indicated on left and right.

**Figure S3.** Purification of HvJAMM1 and HvJAMM2. The HvJAMM1/2 proteins were purified as depicted schematically and described in methods. In general, A) the HvJAMM genes were cloned into pET15b to generate plasmids pJAM991 and 1213, B) the HvJAMM proteins were expressed in recombinant *E. coli* (Rosetta) after addition of IPTG and C) the HvJAMM proteins were purified to apparent homogeneity by  $Ni^{2+}$ -affinity chromatography. Proteins were separated by reducing 12% SDS-PAGE and stained with Coomassie Brilliant Blue. Molecular mass standards ( $M_r$ ) indicated on left.

**Figure S4.** HvJAMM1 is not a broad spectrum protease. In contrast to proteinase K, HvJAMM1 is not a broad spectrum protease. Hemoglobin (lane 1), cytochrome *c* (cyt *c*)(lane 2), carbonic anhydrase (CA)(lane 3), creatine phosphokinase (CPK)(lane 4),  $\beta$ -amylase (lane 5) and bovine serum albumin (BSA)(lane 6) were incubated alone (A), with proteinase K (B), and with HvJAMM1 (C). Assay mixtures were as described in Experimental Procedures with reaction products separated by 12% SDS-PAGE and stained with Coomassie blue. Molecular mass markers are indicated on left.

**Figure S5.** HvJAMM1 did not cleave the amide bond linking aminomethylcoumarin (AMC) to ubiquitin (Ub-AMC). Reaction conditions were as described in Experimental Procedures. In contrast, cleavage of Ub-AMC by the eukaryotic cysteine-type peptidase isopeptidase T (ubiquitin specific peptidase 5, USP5) was readily detected by the assay. USP5 and HvJAMM1 did not hydrolyze GG-AMC using similar methods to monitor cleavage of the amide bond by fluorescence (data not shown).

**Figure S6.** HvJAMM1-mediated desamplation of SAMP conjugates. All reaction mixtures were in 10  $\mu$ l volume using 10  $\mu$ M HvJAMM1 and 'enriched' Flag-SAMP2 conjugates (5  $\mu$ g protein) and were incubated at 50 °C for 2 h in 20 mM HEPES buffer at pH 7.5 with 2 M NaCl unless otherwise indicated. Where indicated, HvJAMM1 was inactivated by addition of 50  $\mu$ M EDTA or boiling (•) for 10 min prior to assay. After assay, samples were separated by reducing 12 % SDS-PAGE and analyzed by  $\alpha$ -Flag immunoblot (see methods for details). Molecular mass standards are indicated on left. A) Optimal enzyme concentration for HvJAMM1 activity. Assays were performed with 0 to 50  $\mu$ M HvJAMM1 supplemented with 500  $\mu$ M ZnCl<sub>2</sub>. B) Time course of enzyme activity with assay



performed using 50  $\mu$ M HvJAMM1 and 'enriched' Flag-SAMP2 conjugates (20  $\mu$ g protein). C) Optimal temperature for HvJAMM1 activity. Assays were performed from 20 to 70  $^{\circ}$ C. D) Optimal salt concentration for HvJAMM1 activity. Assays were performed using 50  $\mu$ M HvJAMM1 and 'enriched' Flag-SAMP2 conjugates (20  $\mu$ g protein) with 0.15 to 2 M NaCl. E) Optimal pH and buffer for HvJAMM1 activity. Assays were performed for 2 h at 25  $^{\circ}$ C in the presence and absence of 10  $\mu$ M HvJAMM1 with 2 M NaCl using 20 mM buffer and pH as indicated.

**Figure S7.** Mapping of sites of sampylation for the SAMP1-MoaE conjugate formed in *H. volcanii*. The conjugate was digested with trypsin and analyzed on a nanoflow HPLC-LTQ Orbitrap XL mass spectrometer. (A) MS/MS spectrum showing Gly-Gly modified Lys240 in peptide LKDEVPIFK. The precursor mass, b ion series and y8 ion are evidence for the modification identified on the peptide. (B) MS/MS spectrum showing Gly-Gly modified Lys247 in peptide LKDEVPIFKK. The precursor mass, b9 ion and the y ion series are evidence for the modification identified on the peptide.

**Figure S8.** HvJAMM1 gene appears essential. Plasmids and primers used for this analysis are detailed in Table S1-S2. Integration of the HvJAMM1 'knockout' plasmid pJAM1769 onto the genome of *H. volcanii* (pop-ins) was confirmed by PCR (lanes 3,4). PCR-based screening of 'pop-outs' for deletion of the HvJAMM1 gene (lanes 5-9, with 5 representative clones depicted out of 460 total) revealed only reversion to wild-type. Hi-Lo DNA markers (M, lane 1) with molecular masses are indicated on left. Strain H26 was the parental control (wt, lane 2). PCR products were generated using Taq DNA polymerase, primer pair 14 (Table S2) and genomic DNA as template according to supplier (New England Biolabs). PCR products were separated by 0.8 % (w/v) agarose

gels in TAE buffer at pH 8.0, stained with ethidium bromide, and visualized by fluorescence according to standard methods.

**Figure S9.** Linear-linked SAMP1-MoaE generates functional SAMP1 protein for protein modification (A, B) and MoCo biosynthesis (C) when synthesized in *H. volcanii*. Samp1ylation was monitored by expression of linear-linked SAMP1-MoaE in *H. volcanii* strains with (+) and without (-) a functional *ubaA* gene, with distinguishing features for each strain indicated on the top (A and B). Linear SAMP1-MoaE included an N-terminal Flag tag and C-terminal StrepII tag to allow for visualization of the proteins by  $\alpha$ -FLAG and  $\alpha$ -StrepII immunoblot, respectively. C) MoCo biosynthesis was monitored by growth of *H. volcanii* on ATCC974 medium with DMSO as a terminal electron acceptor as previously described (Humbard et al., 2010). Strains included H26 parent (■), HM1109 (□), HM1109-pJAM202c (○), HM1109-pJAM1314 (▲), HM1109-pJM1796 (●) and HM1109-pJAM1804 (Δ) with distinguishing features indicated on right (C).

**Figure S10.** Effect of various chemical compounds on HvJAMM1 activity. All reactions (10  $\mu$ l) were in 20 mM HEPES buffer at pH 7.5 with 2 M NaCl and included 10  $\mu$ M HvJAMM1, Flag-SAMP2 conjugate (in 5  $\mu$ g cell lysate), and chemical compound in molar ratio with the enzyme as indicated above each lane. Chemicals included: A) phenylmethanesulfonylfluoride (PMSF), B) *N*-ethylmaleimide (NEM), C) 1,10-phenanthroline (phen), and D) *N,N,N',N'*-tetrakis (2-pyridyl-methyl) ethylenediamine or TPEN. After incubation for 2 h at 50 °C, samples were separated by reducing 12 % SDS-PAGE and analyzed by  $\alpha$ -Flag immunoblot (see methods for details). Molecular mass standards are indicated on left.

**Figure S11.** Comparison of HvJAMM1 wild-type (WT) and site-directed variants by SDS-PAGE and circular dichroism. A) Purified HvJAMM1 proteins (1 ug per lane) were separated by reducing 12 % SDS-PAGE and stained by Coomassie Blue. Molecular mass standards ( $M_r$  Std) are indicated on left. B and C) CD spectra for purified HvJAMM1 WT and site-directed variants in the absence (B) and presence of supplementation with 500  $\mu$ M ZnCl<sub>2</sub> (C). Average absorbance of triplicate measurements for each sample (+/- 0.001) are presented and were used as basis for converting CD signal in mdeg to molar ellipticity.

### Suppl. References

- Allers, T., Ngo, H.P., Mevarech, M., and Lloyd, R.G. (2004). Development of additional selectable markers for the halophilic archaeon *Haloferax volcanii* based on the *leuB* and *trpA* genes. *Appl. Environ. Microbiol.* **70**: 943-953.
- Humbard, M.A., Miranda, H.V., Lim, J.M., Krause, D.J., Pritz, J.R., Zhou, G. et al. (2010). Ubiquitin-like small archaeal modifier proteins (SAMPs) in *Haloferax volcanii*. *Nature* **463**: 54-60.
- Miranda, H.V., Nembhard, N., Su, D., Hepowitz, N., Krause, D.J., Pritz, J.R. et al. (2011). E1- and ubiquitin-like proteins provide a direct link between protein conjugation and sulfur transfer in archaea. *Proc. Natl. Acad. Sci. U. S. A.* **108**: 4417-4422.
- Szklarczyk, D., Franceschini, A., Kuhn, M., Simonovic, M., Roth, A., Minguéz, P. et al. (2011). The STRING database in 2011: functional interaction networks of proteins, globally integrated and scored. *Nucleic Acids Res* **39**: D561-D568.
- Wendoloski, D., Ferrer, C., and Dyll-Smith, M.L. (2001). A new simvastatin (mevinolin)-resistance marker from *Haloarcula hispanica* and a new *Haloferax volcanii* strain cured of plasmid pHV2. *Microbiology* **147**: 959-964.



Fig. S2

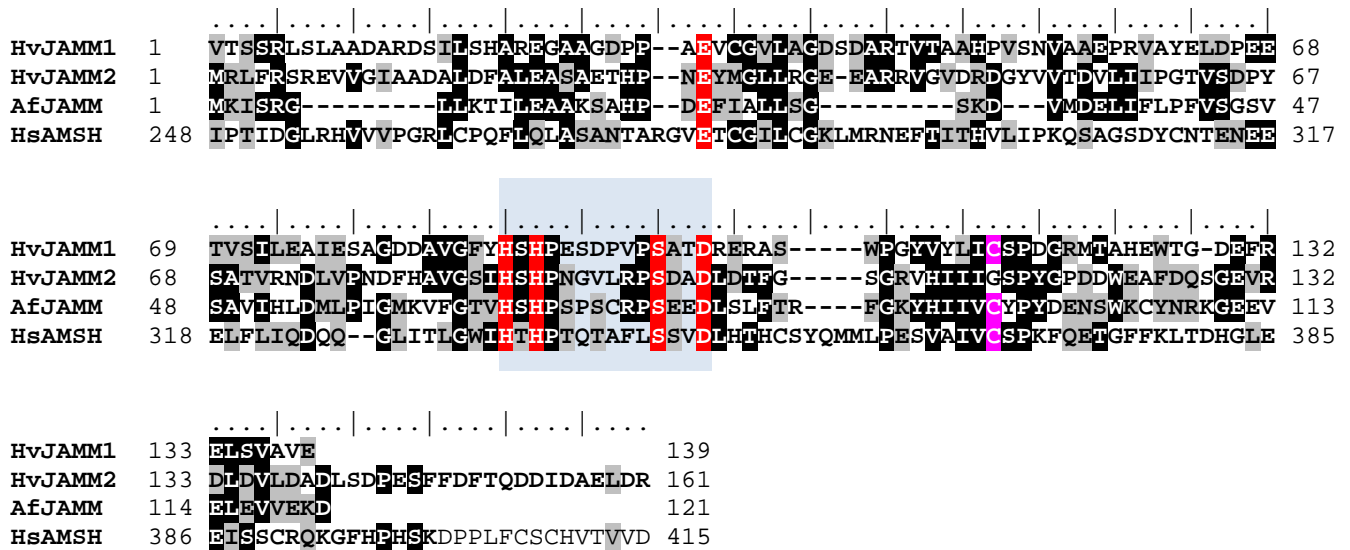

**Fig. S3**

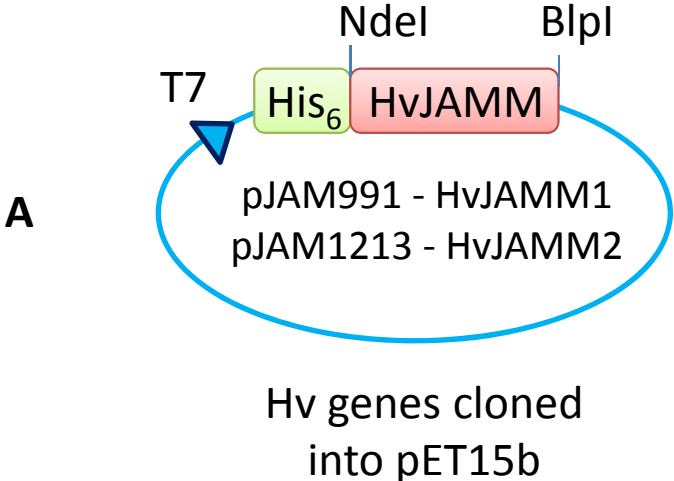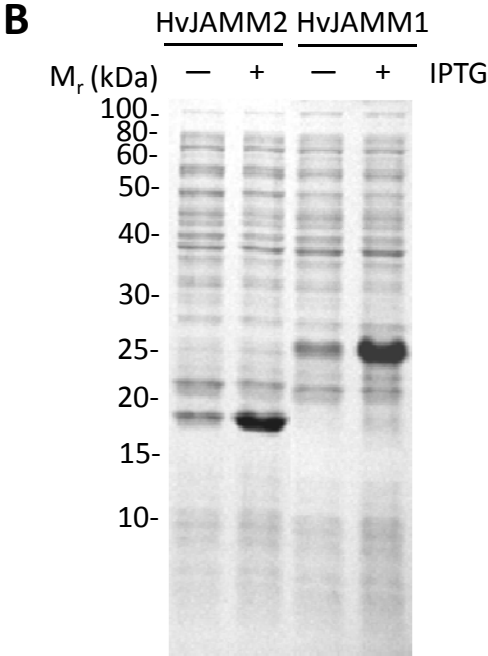

HvJAMM  
produced in *E. coli*

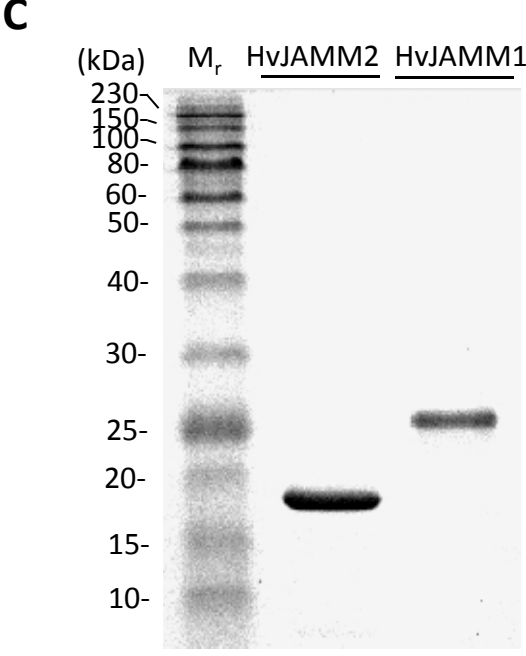

HvJAMM  
protein purified

**Figure S4.**

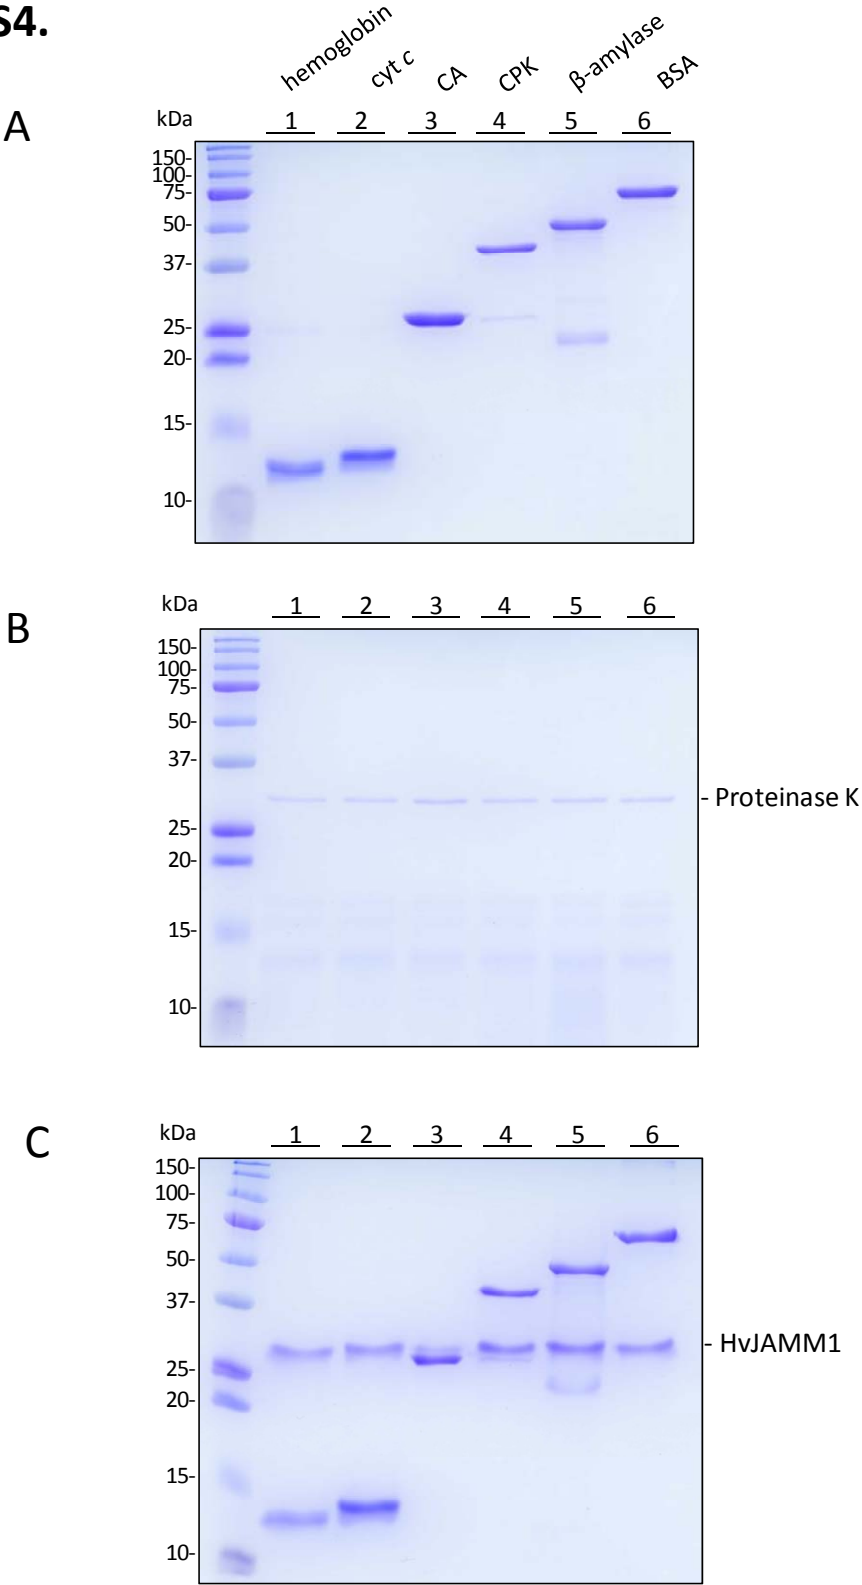

Figure S5.

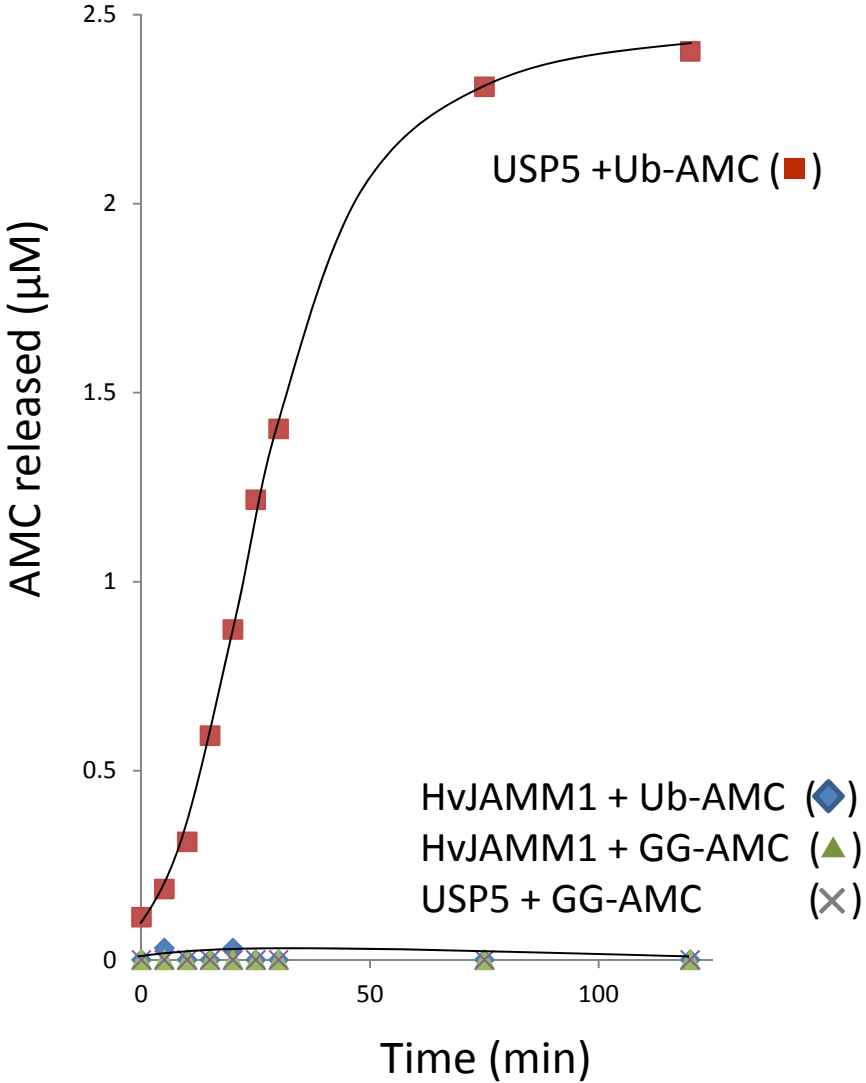



**Fig. S6**

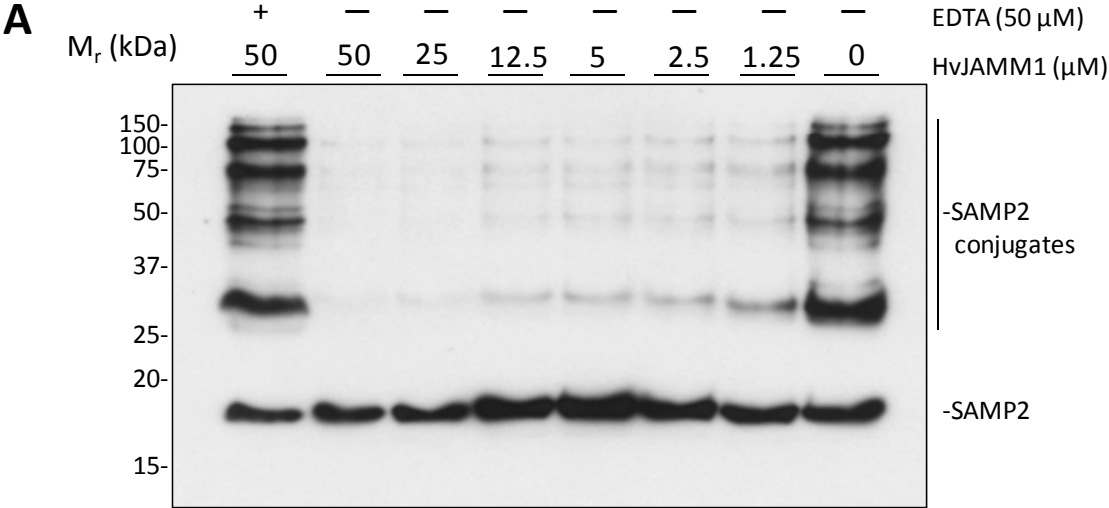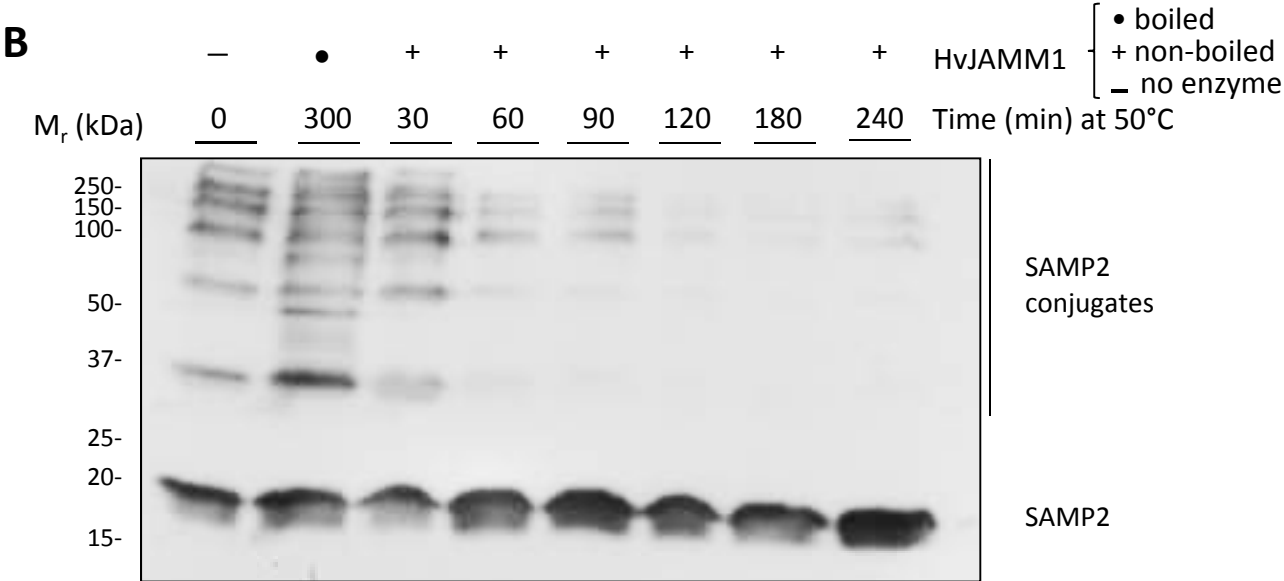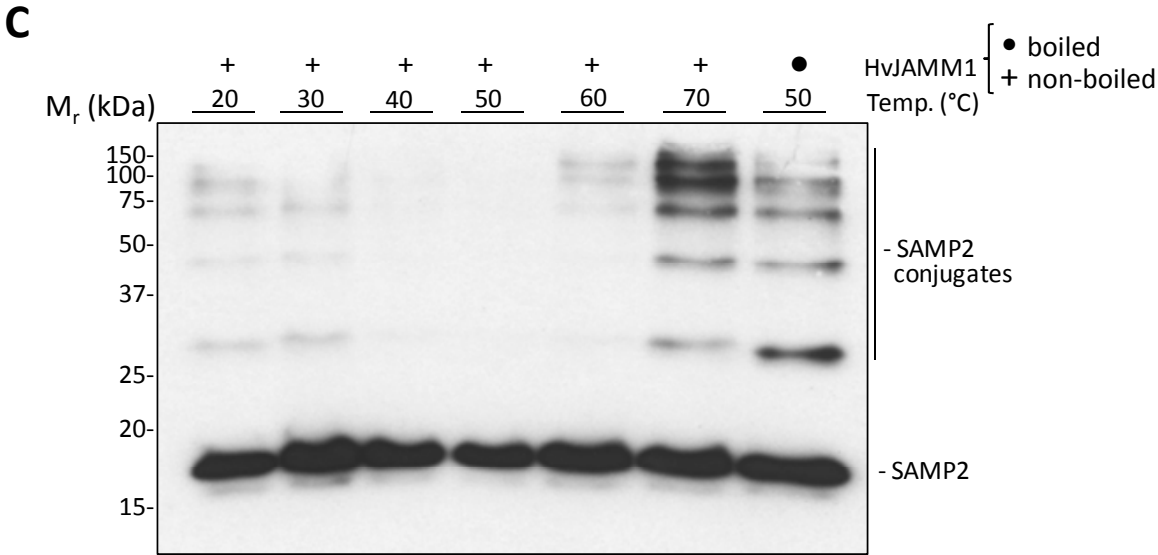

**Fig. S6**

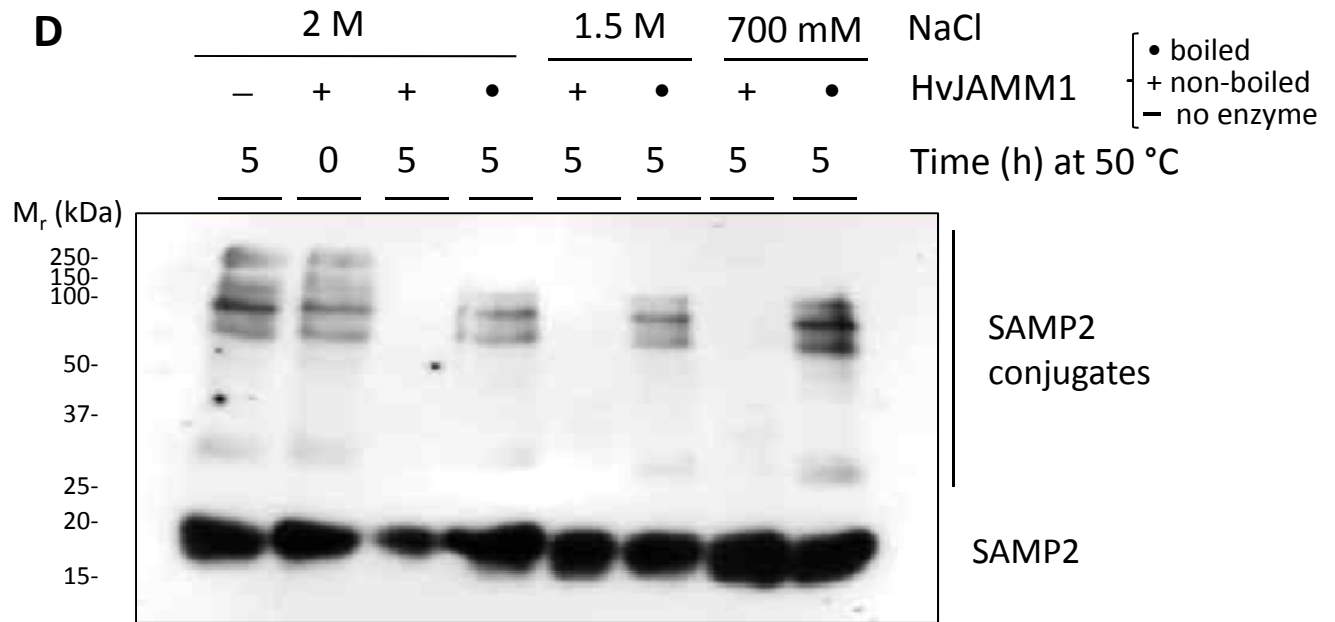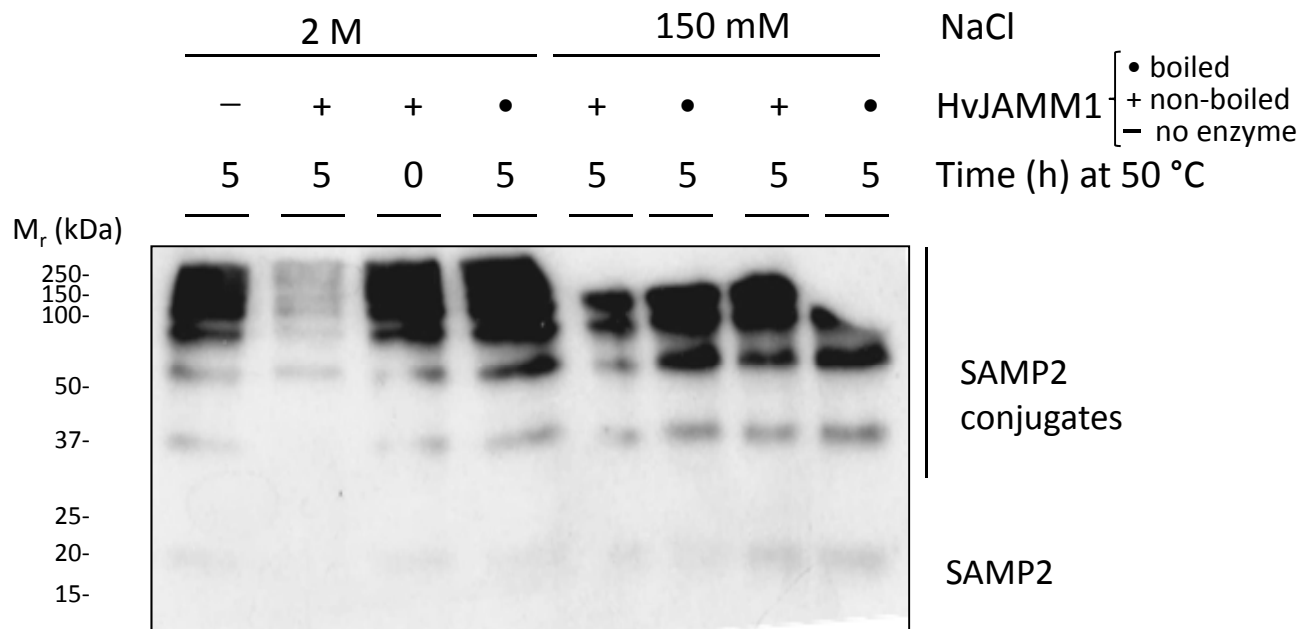

**Fig. S6**

**E**

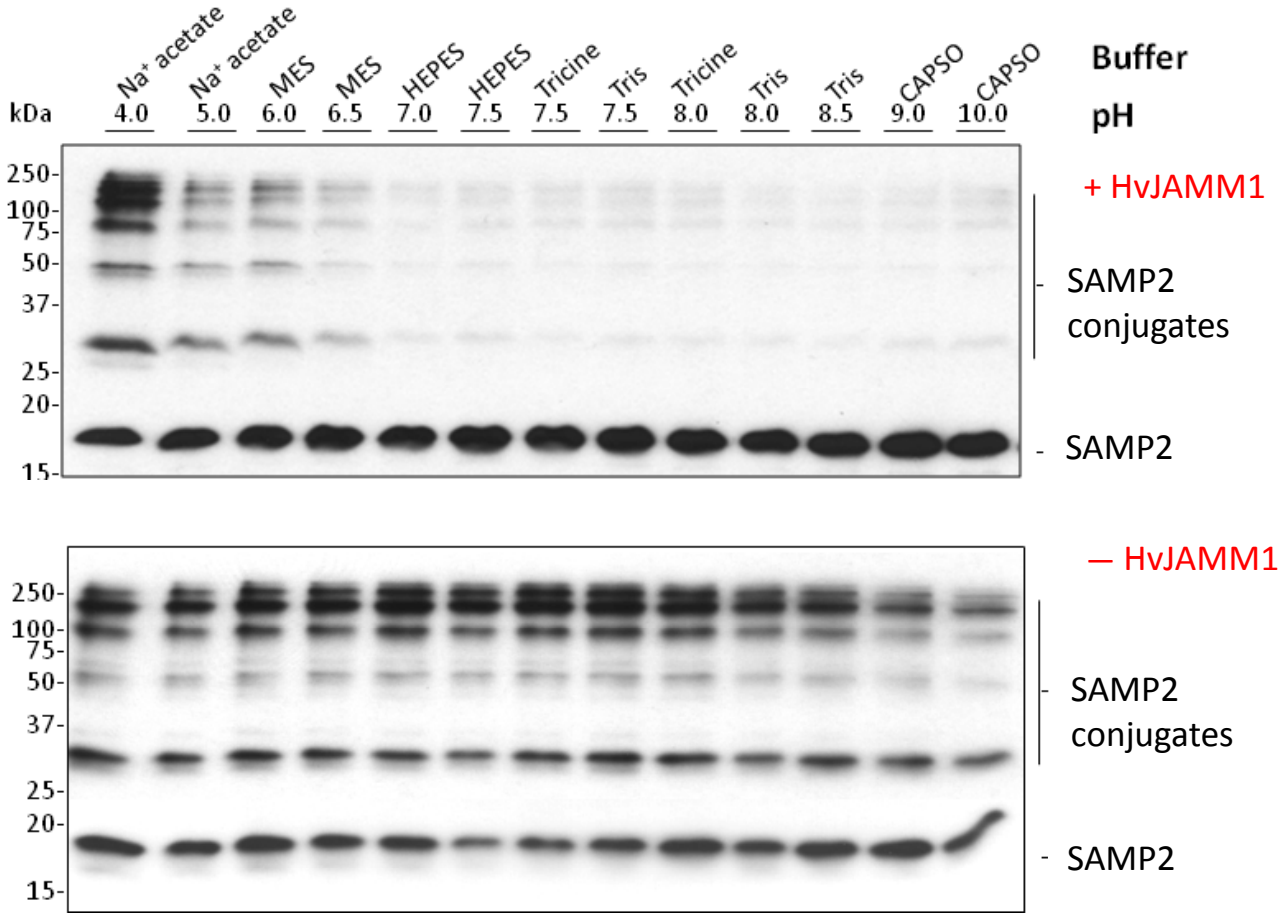

Fig. S7

A

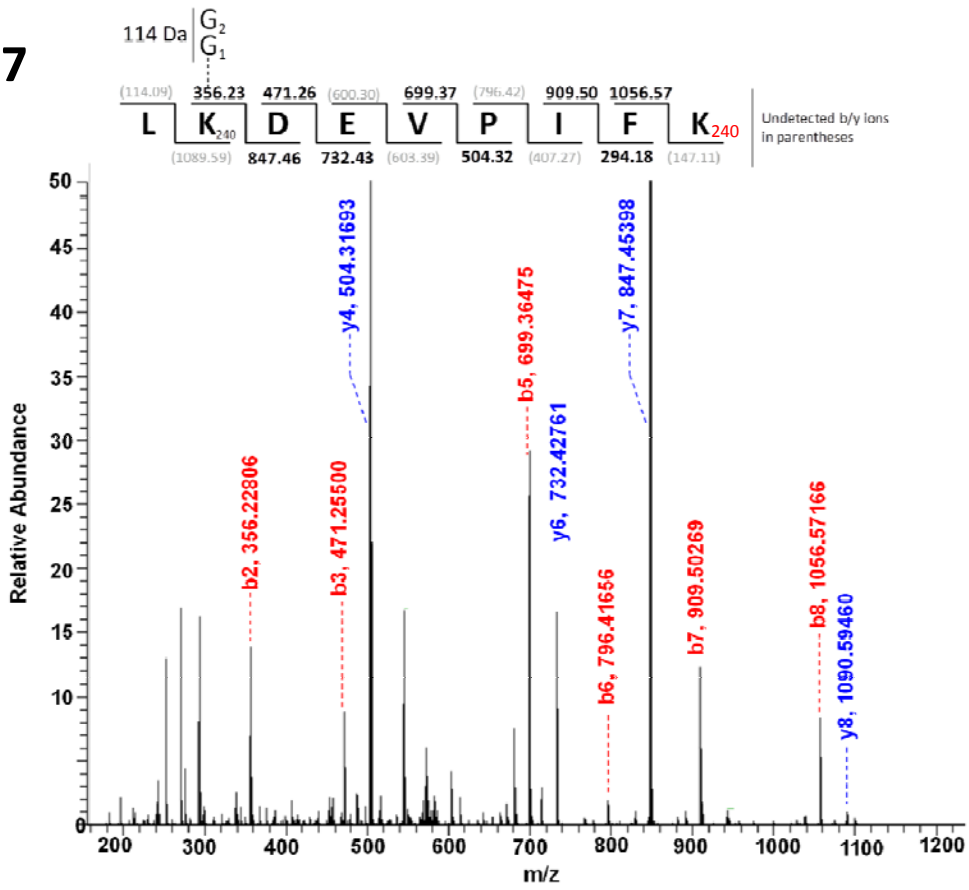

B

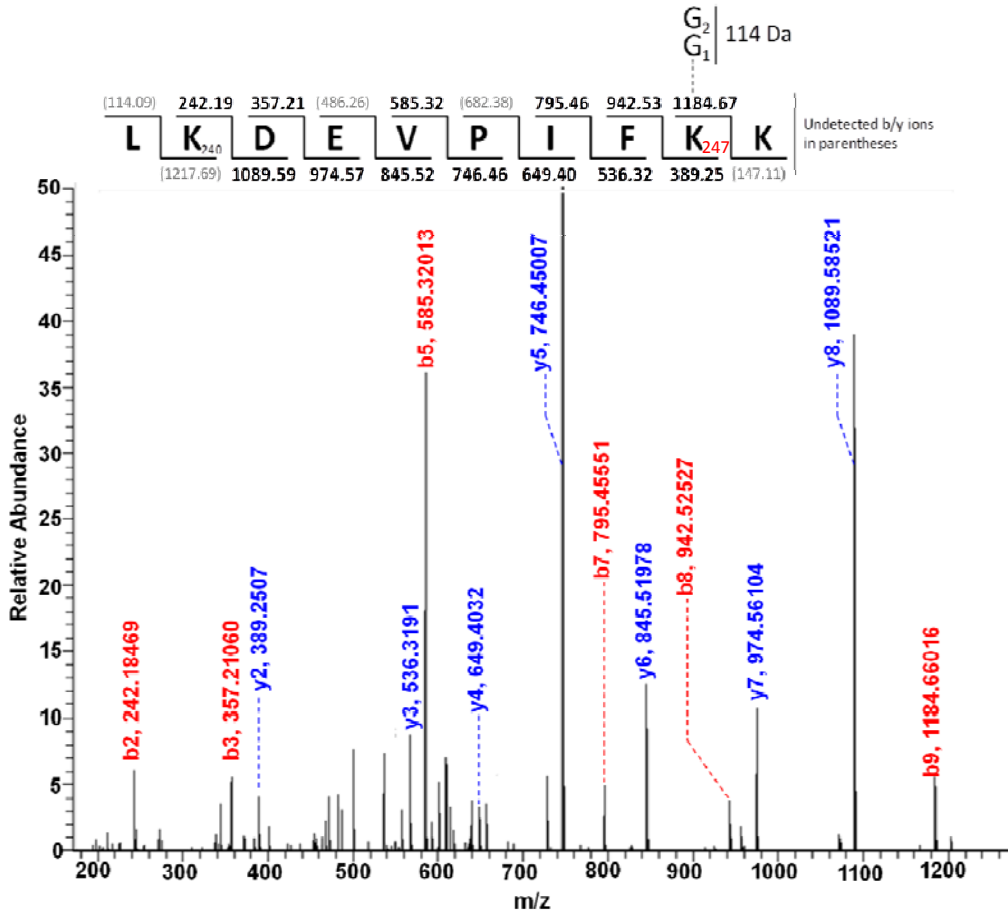

**Fig. S8**

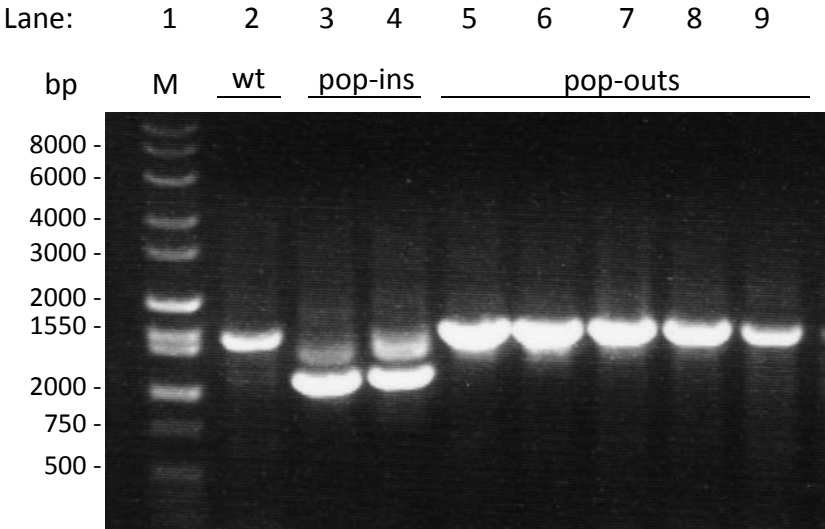

**Fig. S9**

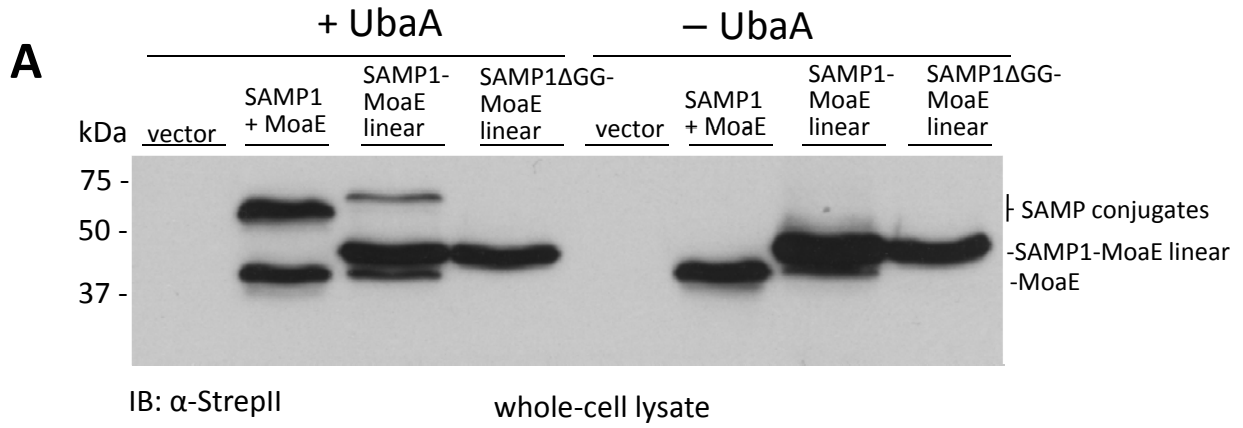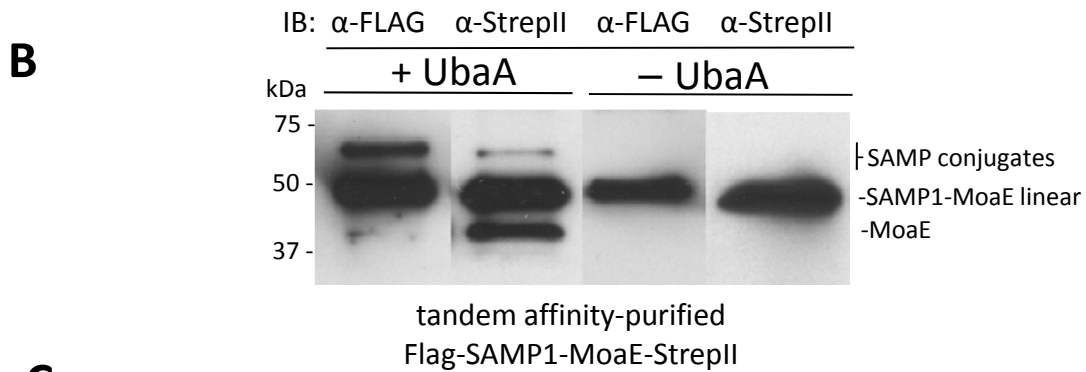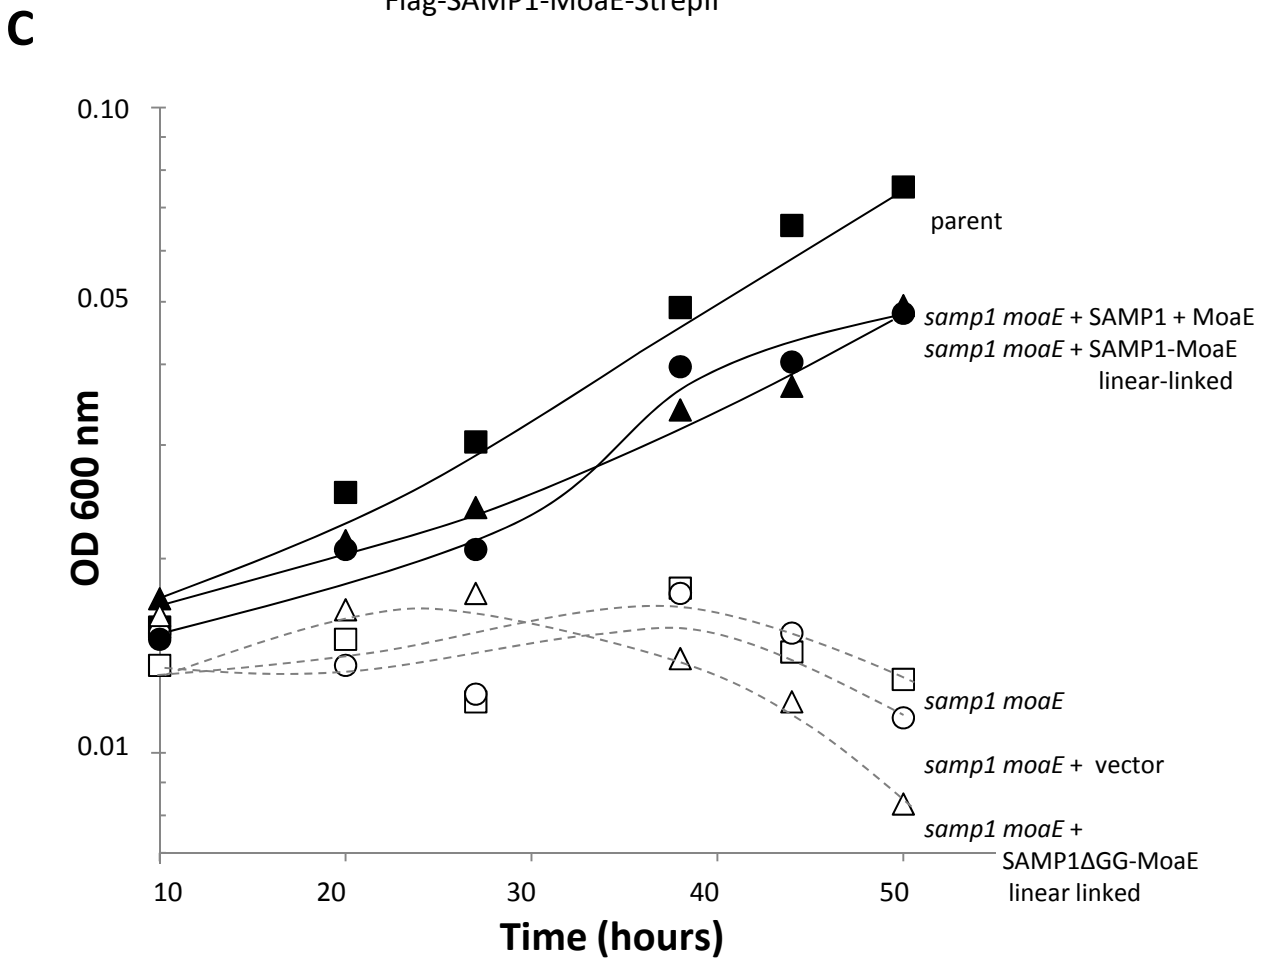

**Fig. S10**

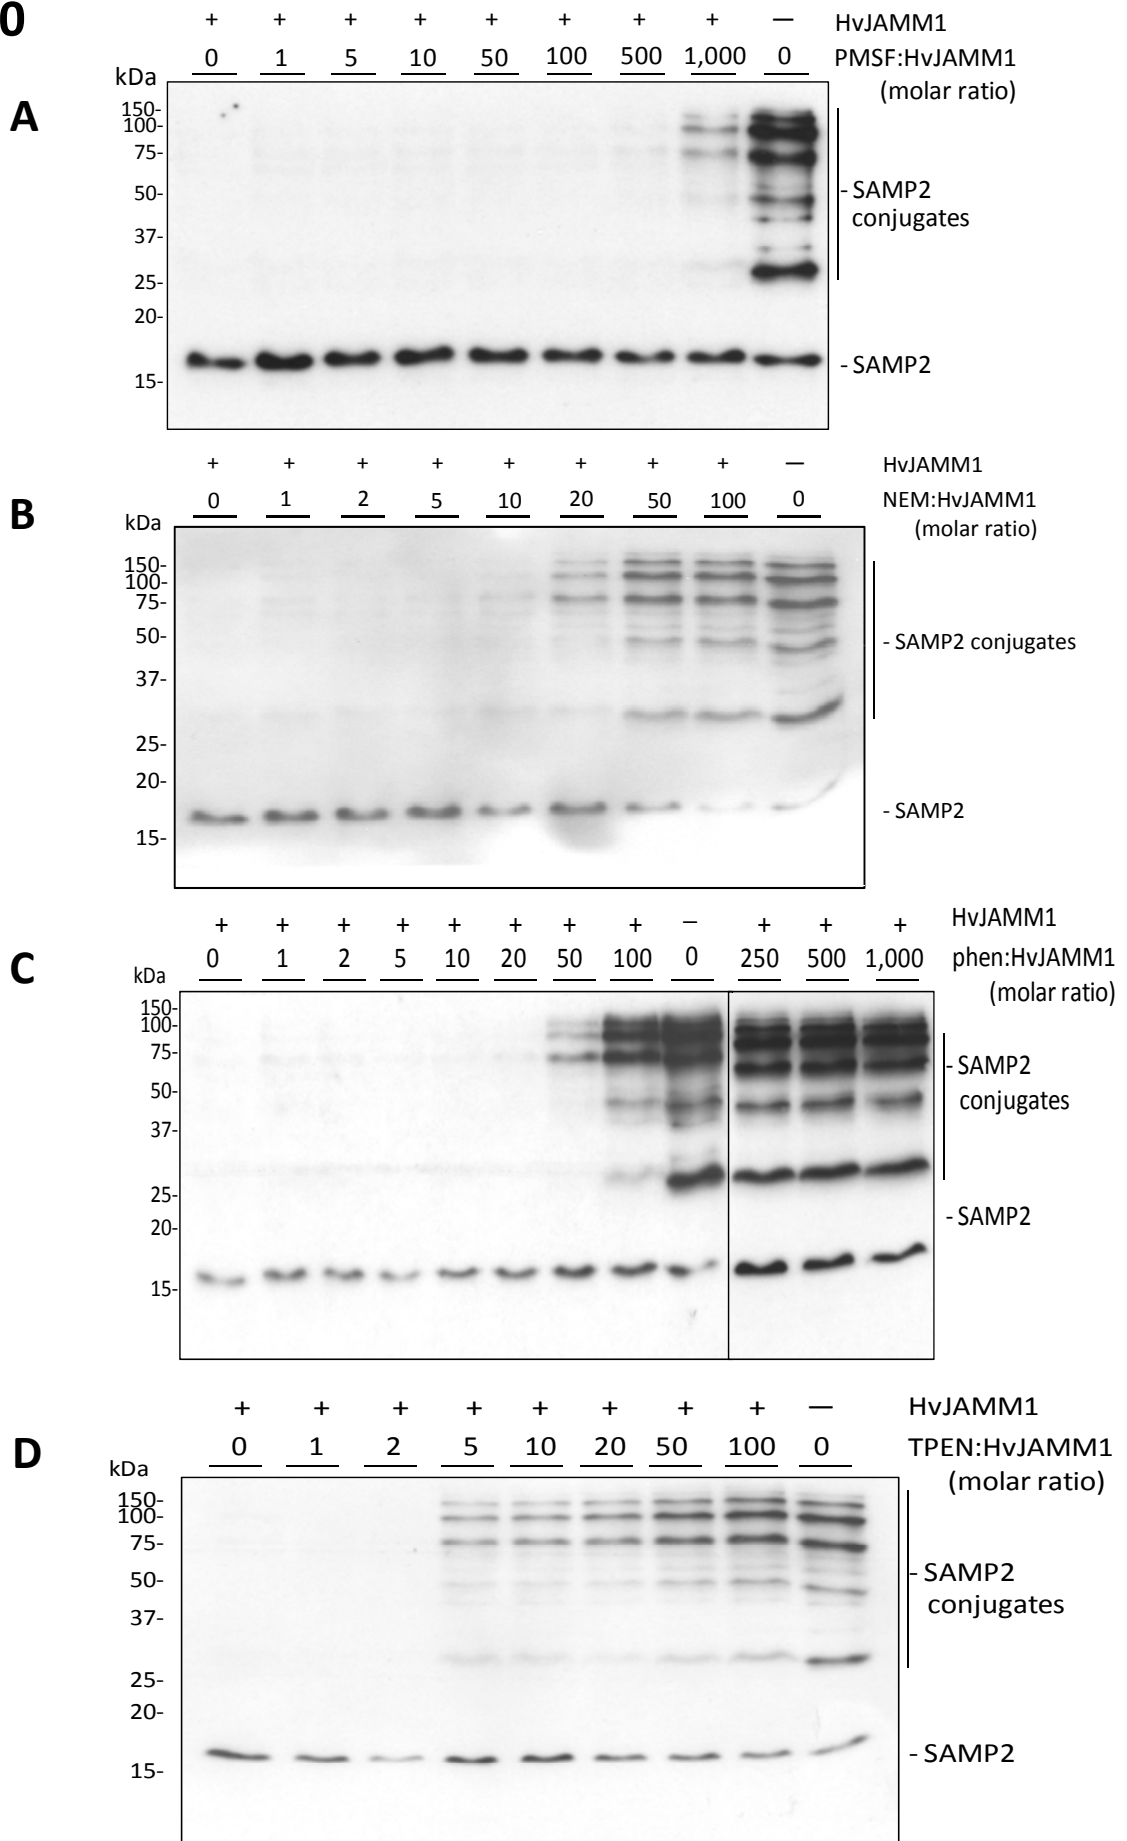

**Fig. S11**

**A**

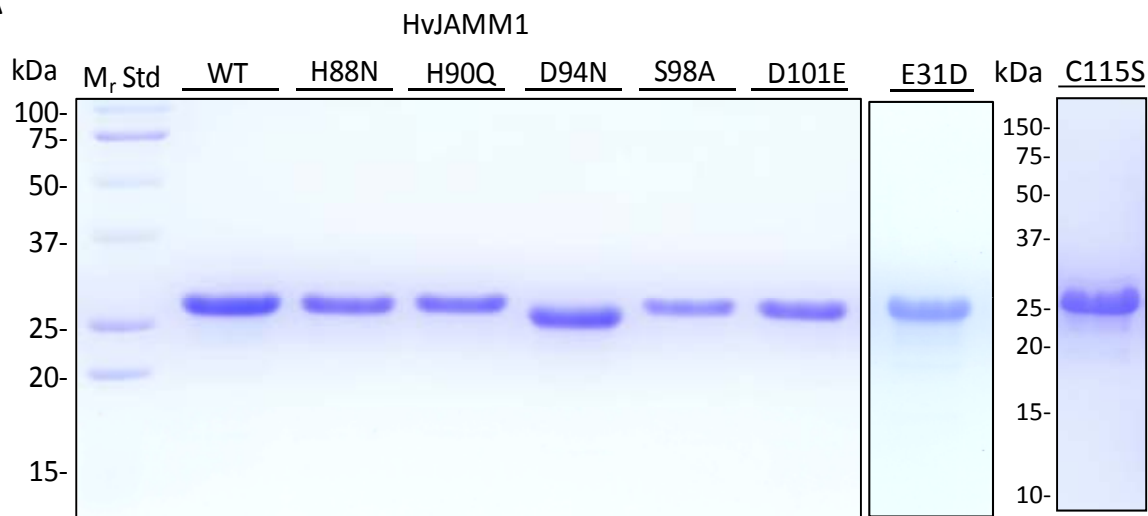

**B**

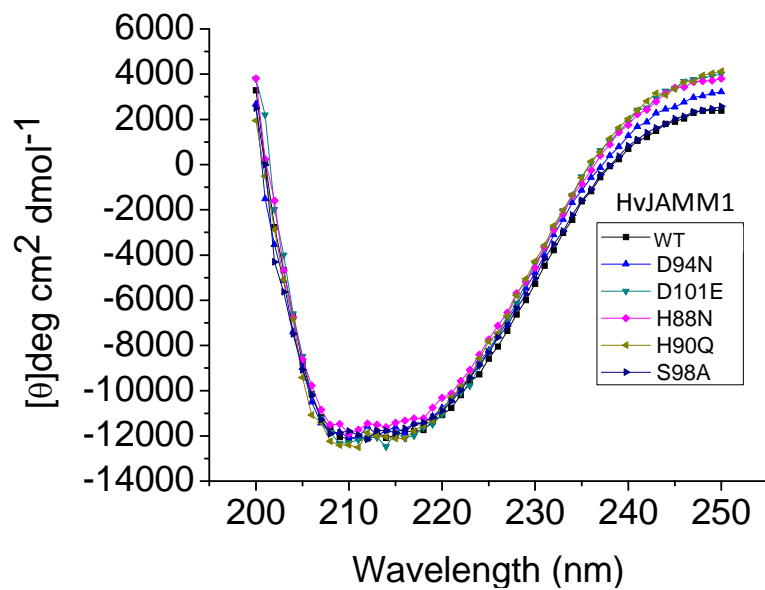

**C**

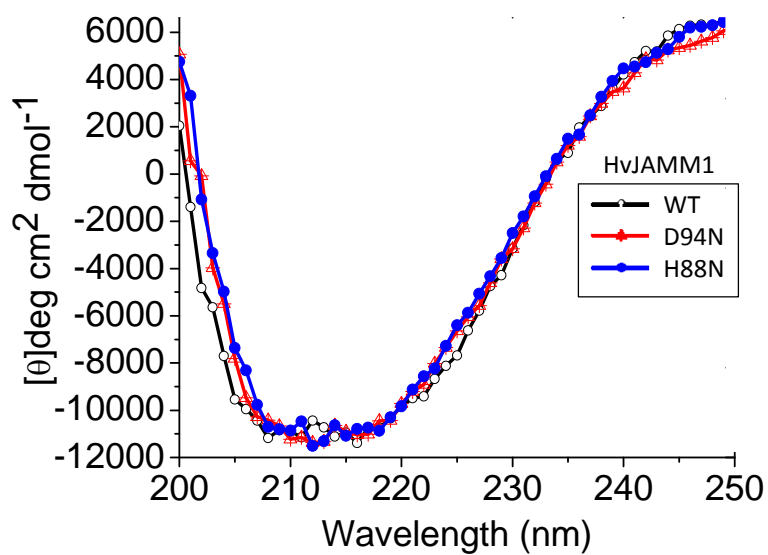

Supplement: NIHMS407671-supplement-Supp_Figure_S1-S11_Table_S1-S3.pdf [file NIHMS407671-supplement-Supp_Figure_S1-S11_Table_S1-S3.pdf]
